# Supplementary material for: COVID-19 and the heart: what we have learnt so far
Source: PubMed Central journal article supplement (PMC10016902; doi:10.1136/postgradmedj-2020-138284), 2020-09-17
Supplement: postgradmedj-97-655-dc1-inline-supplementary-material-1.pdf [file postgradmedj-97-655-dc1-inline-supplementary-material-1.pdf]

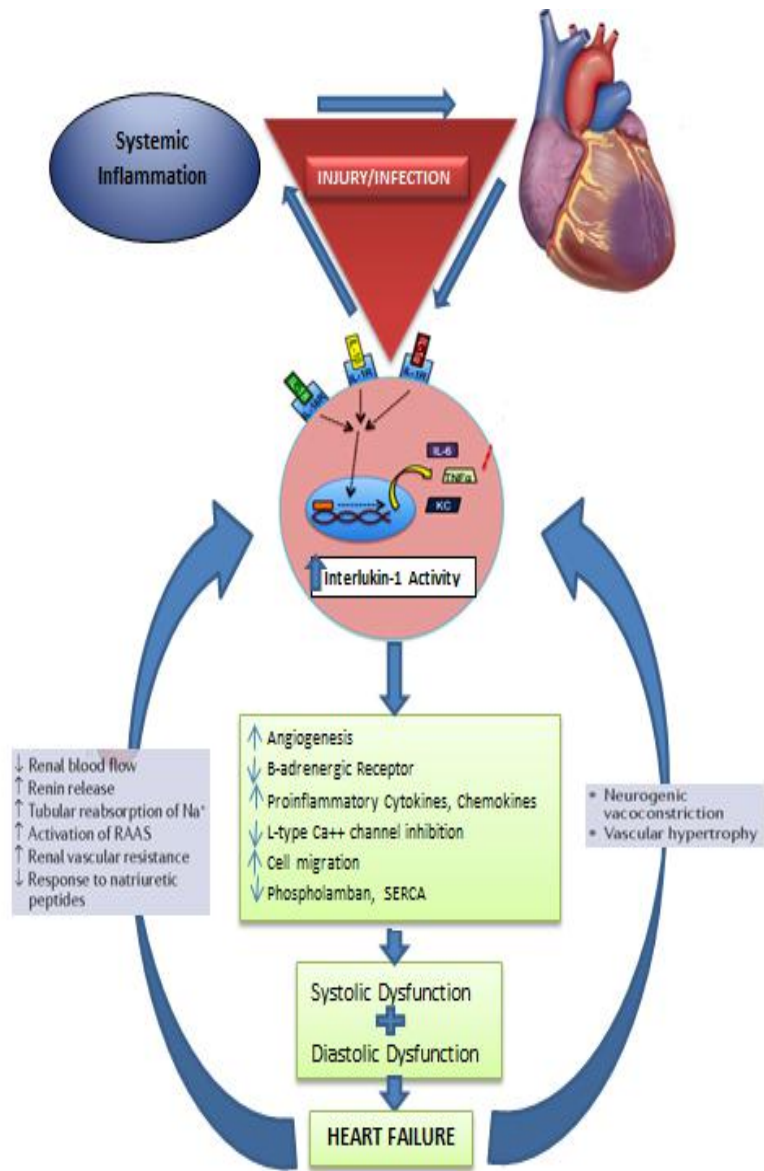

Figure 1. Mechanism of HFpEF & HFrEF with defined role of IL-1.

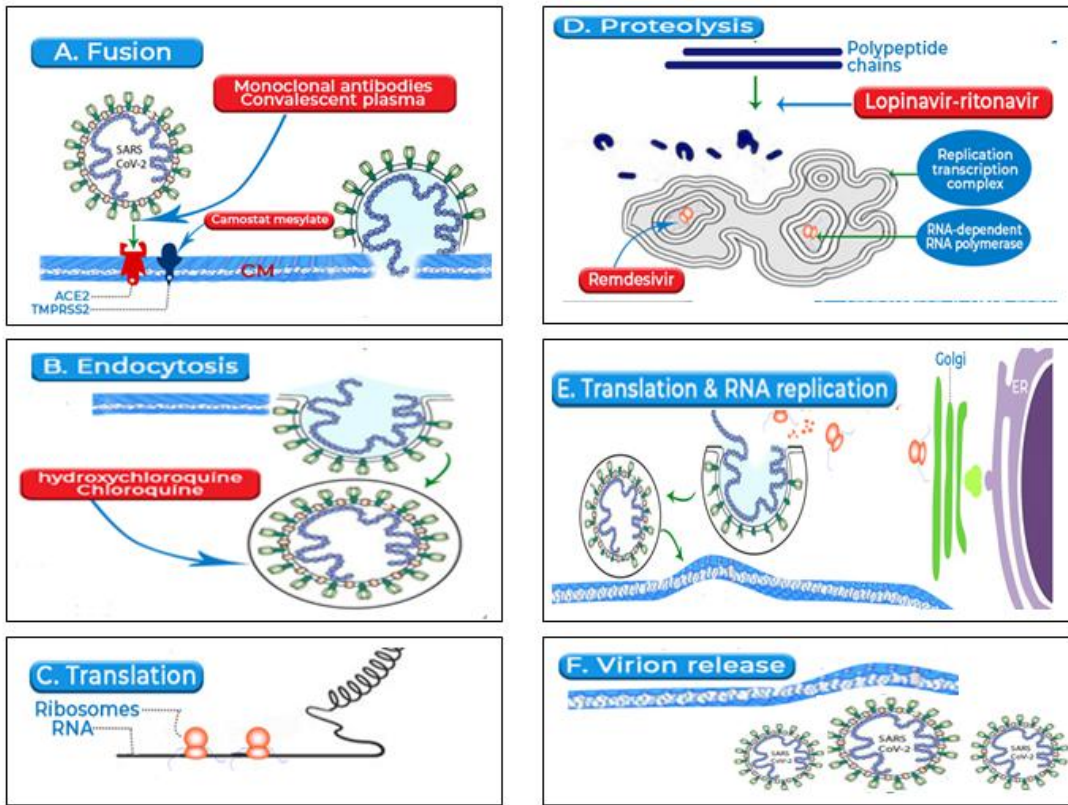

Figure 2: SARS-Cov-2 virology and possible therapeutic intervention.
